# Supplementary material for: Cytotoxicity and chemical composition of women's personal PM2.5 exposures from rural China
Source: Royal Society of Chemistry journal article supplement (doi:10.1039/d1ea00022e), 2021-01-01
Supplement: d1ea00022e1.pdf [file d1ea00022e1.pdf]

### Supplementary Information

Table S1. Summary of filters in each composite

| Site    | Season | N (filters in composite) | PM <sub>2.5</sub> mass in composite (µg) |
|---------|--------|--------------------------|------------------------------------------|
| Beijing | summer | 40                       | 3731                                     |
| Beijing | winter | 35                       | 5312                                     |
| Shanxi  | summer | 35                       | 3859                                     |
| Shanxi  | winter | 30                       | 4495                                     |
| Sichuan | summer | 30                       | 6245                                     |
| Sichuan | winter | 20                       | 10952                                    |

Table S2. Sequences of Homo sapiens primers used for qPCR

| Gene     | Forward primer (5'-3') | Reverse primer (5'-3') |
|----------|------------------------|------------------------|
| β-Actin  | TCGTGCGTGACATTAGGAG    | CCATCTCTTGCTCGAAGTCC   |
| IL-6     | GCAAGTCTCCTCATTGAATCC  | GGCACTGGCAGAAAACAACC   |
| IL-8     | TCTGGCAACCCTAGTCTGCT   | AAACCAAGGCACAGTGGAAC   |
| Cyp1a1   | TCTCCTGGAGCCTCATGTATT  | ACCTGCCAATCACTGTGTCTA  |
| Cyp1b1   | GAAACCTCGACTTTGCCAGG   | CACCGCTTGGATTGGGATG    |
| NQO-1    | TGGTGGAGTCGGACCTCTAT   | CGCAGGGTCCTTCAGTTTA    |
| Catalase | TTCTTGGATGCAAAGTGCTG   | G TTCAGCTGAACCCGATTCTC |
| HO-1     | GAGAAAGCAAGTGGCTCACC   | TGACGGACCTGGTTCTTACC   |
| SOD1     | TCACTGTGGCTGTACCAAGG   | GAAAGTGCTGACCTGCATCA   |

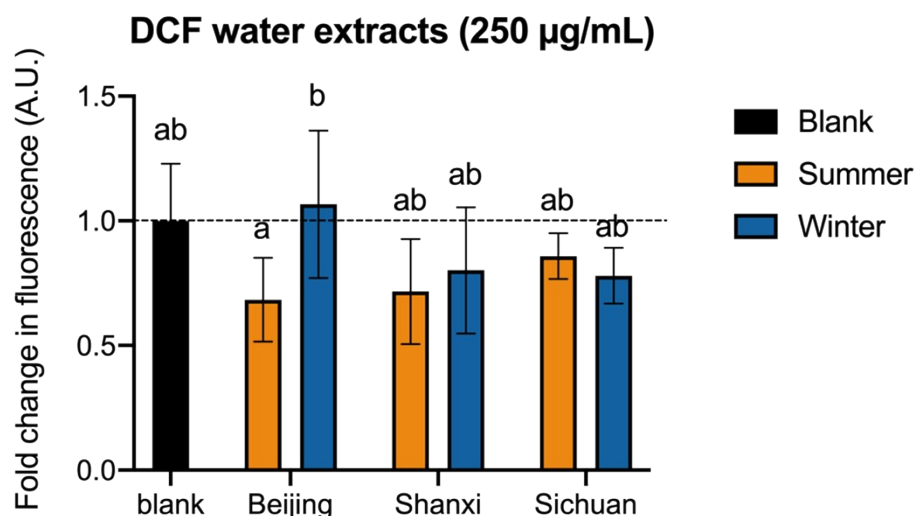

Figure S1. Cellular ROS generation from water extracts at 250 µg/mL using the dichlorodihydrofluorescein (DCF) probe. Bar height and error bars represent arithmetic mean ± SEM of fluorescence normalized to controls (A.U.: arbitrary units). Means with different letters are significantly different at  $p < 0.05$  (Tukey HSD test).

Table S3. Chemical source profiles used in chemical mass balance source apportionment

|                            | Vehicle emissions<br>(He et al., 2008) <sup>1</sup> | Wood burning<br>(Zhang, 2006) <sup>2</sup> | Residential coal burning<br>(Zhang et al., 2008) <sup>3</sup> |
|----------------------------|-----------------------------------------------------|--------------------------------------------|---------------------------------------------------------------|
| Levoglucosan               | 0 ± 1.00E-08                                        | 8.68E-02 ± 5.92E-02                        | 9.81E-04 ± 1.71E-03                                           |
| 17β(H)-21α(H)-30-norhopane | 1.39E-04 ± 8.55E-06                                 | 0 ± 1.00E-08                               | 2.19E-04 ± 3.40E-04                                           |
| 17α(H)-21β(H)-hopane       | 2.56E-04 3.27E-05                                   | 0 ± 1.00E-08                               | 1.18E-04 ± 1.71E-04                                           |
| Benzo[ghi]perylene         | 8.54E-05 ± 3.82E-06                                 | 3.34E-04 ± 2.72E-04                        | 8.23E-04 ± 4.67E-04                                           |
| Benzo[b]fluoranthene       | 4.64E-05 ± 6.09E-06                                 | 7.53E-04 ± 6.06E-04                        | 2.18E-03 ± 1.56E-03                                           |
| Benzo[k]fluoranthene       | 1.26E-05 ± 1.64E-06                                 | 2.26E-04 ± 1.85E-04                        | 5.04E-04 ± 3.48E-04                                           |
| Perylene                   | 7.55E-06 ± 8.18E-07                                 | 9.12E-05 ± 7.38E-05                        | 1.96E-04 ± 1.68E-04                                           |
| Benzo[e]pyrene             | 3.77E-05 ± 4.09E-06                                 | 2.97E-04 ± 2.19E-04                        | 1.12E-03 ± 6.01E-04                                           |
| Picene                     | 0 ± 1.00E-08                                        | 8.00E-06 ± 5.92E-05                        | 2.84E-04 ± 1.59E-04                                           |
| Coronene                   | 1.65E-05 ± 1.00E-06                                 | 9.70E-05 ± 8.20E-05                        | 1.79E-04 ± 1.14E-04                                           |
| Hexacosane                 | 1.22E-04 ± 3.27E-05                                 | 4.88E-05 ± 9.50E-07                        | 2.62E-04 ± 4.32E-04                                           |
| Heptacosane                | 7.08E-05 ± 1.97E-05                                 | 5.47E-05 ± 2.70E-05                        | 1.73E-04 ± 2.65E-04                                           |
| Octacosane                 | 5.11E-05 ± 3.45E-06                                 | 1.61E-05 ± 1.90E-06                        | 7.98E-05 ± 1.49E-04                                           |
| Nonacosane                 | 3.23E-05 ± 1.82E-06                                 | 1.76E-05 ± 4.90E-06                        | 5.98E-05 ± 9.94E-05                                           |
| Triacontane                | 1.63E-05 ± 2.64E-06                                 | 7.45E-06 ± 2.65E-06                        | 3.45E-05 ± 6.58E-05                                           |
| Hentriacontane             | 1.55E-06 ± 2.73E-07                                 | 1.71E-05 ± 1.71E-05                        | 1.80E-05 ± 3.18E-05                                           |
| Hexadecanoic acid          | 1.24E-04 ± 2.36E-05                                 | 1.53E-03 ± 4.40E-04                        | 1.06E-03 ± 1.02E-03                                           |
| Octadecanoic acid          | 5.34E-05 ± 1.40E-05                                 | 3.35E-04 ± 1.28E-04                        | 2.06E-04 ± 2.84E-04                                           |
| Eicosanoic acid            | 3.73E-06 ± 8.18E-07                                 | 1.25E-04 ± 5.48E-05                        | 2.88E-05 ± 3.65E-05                                           |
